# Supplementary material for: LipiSensors: Exploiting Lipid Nanoemulsions to Fabricate Ionophore-Based Nanosensors
Source: MDPI journal article supplement (doi:10.3390/bios10090120), 2020-09-10
Supplement: s1 [file s1]

Supplemental Information For

# LipiSensors: Exploiting Lipid Nanoemulsions to Fabricate Ionophore Based Nanosensors

Alexandra L. Dailey<sup>1</sup>, Meredith D. Greer<sup>1</sup>, Tyler Z. Sodja<sup>2</sup>, Megan P. Jewell<sup>1</sup>, Tabitha A. Kalin<sup>1</sup> and Kevin J. Cash<sup>1,2,\*</sup>

<sup>1</sup> Chemical and Biological Engineering, Colorado School of Mines, Golden, 80401 CO, USA; alexandra dailey@alumni.mines.edu (A.L.D.); meredithgreer@alumni.mines.edu (M.D.G.); megan.jewell@colorado.edu (M.P.J.); tkalin@alumni.mines.edu (T.A.K.)

<sup>2</sup> Quantitative Biosciences and Engineering, Colorado School of Mines, Golden, 80401 CO, USA.; tsodia@mines.edu

\* Correspondence: kcash@mines.edu; Tel.: +1-303-273-3631

Received: 19 August 2020; Accepted: 8 September 2020; Published: date

**Table S1.** LipiSensor formulations and their respective diameter. 1: polyoxyethylene-40-stearate. 2: 1,2-dipalmitoyl-sn-glycero-3-phosphocholine. 3: Suppocire NC™. 4: soybean oil.

|        | Surfactant <sup>1</sup><br>(mg) | Lipid <sup>2</sup><br>(mg) | Wax <sup>3</sup><br>(mg) | Oil <sup>4</sup><br>( $\mu$ L) | Ca <sup>+2</sup><br>Ionophore<br>(mg) | NaBARF<br>(mg) | CHIII<br>(mg) | Saline<br>( $\mu$ L) | Approximate<br>Diameter<br>(nm) | DLS<br>Diameter<br>(nm) |
|--------|---------------------------------|----------------------------|--------------------------|--------------------------------|---------------------------------------|----------------|---------------|----------------------|---------------------------------|-------------------------|
| Small  | 258.8                           | 25                         | 215.5                    | 74.2                           | 3.75                                  | 6.0            | 0.65          | 1046                 | 120                             | 142 $\pm$ 32.7          |
| Medium | 172.5                           | 25                         | 215.5                    | 74.2                           | 3.75                                  | 6.0            | 0.65          | 1046                 | 220                             | 226 $\pm$ 5.71          |
| Large  | 86.3                            | 25                         | 215.5                    | 74.2                           | 3.75                                  | 6.0            | 0.65          | 1046                 | 320                             | 322 $\pm$ 8.06          |

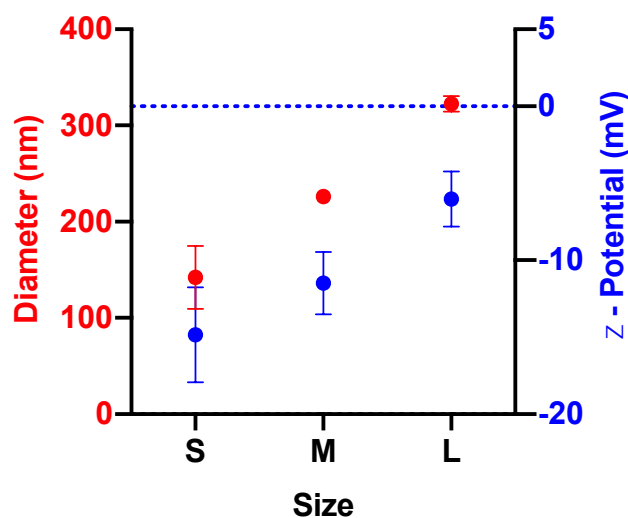

**Figure S1.** Changing the LipiSensor formulation changes both the size and  $\zeta$ -potential of the particles. As size increases, the  $\zeta$ -potential becomes less negative.

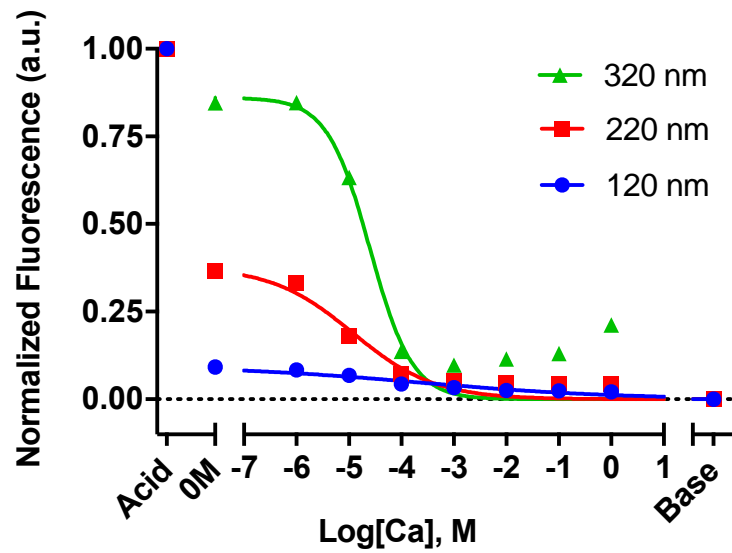

**Figure S2.** LipiSensors of each size have a dose-dependent response to increasing  $[Ca^{2+}]$ . Each size has slightly different response character (see Figure 2).

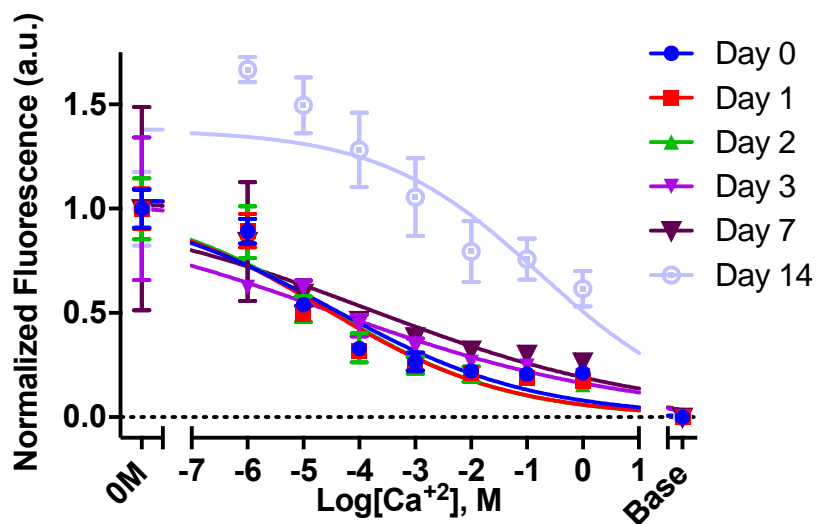

**Figure S3.** Between day 7 and day 14 the sensor response drastically changes, likely as a result of sensor degradation.

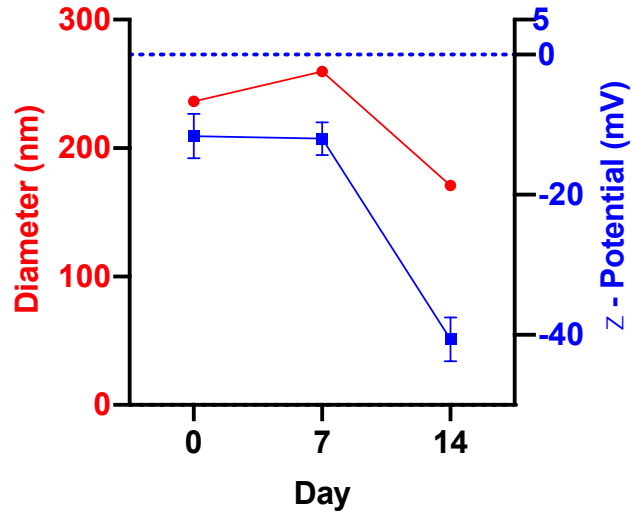

**Figure S4.** Between day 7 and day 14 the size and  $\zeta$  -potential of the LipiSensors (medium) are impacted dramatically, also likely as a result of sensor degradation.

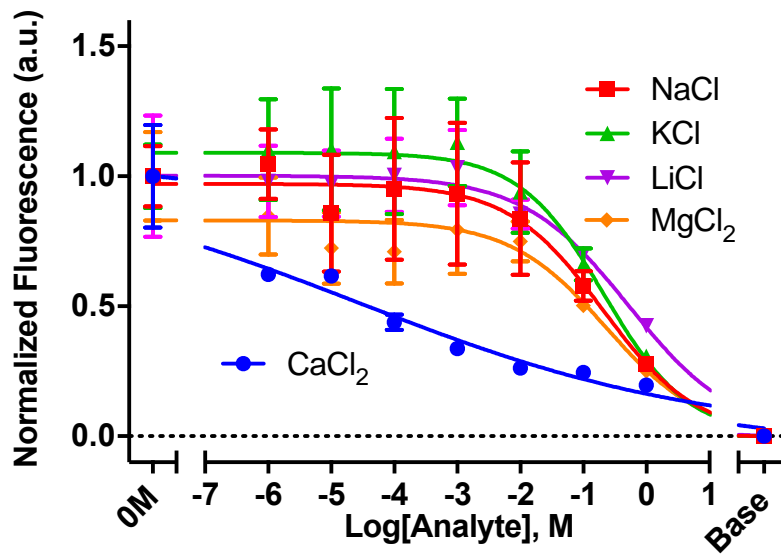

**Figure S5.** LipiSensors have a selective response to  $\text{Ca}^{+2}$  ( $n = 3$ ).

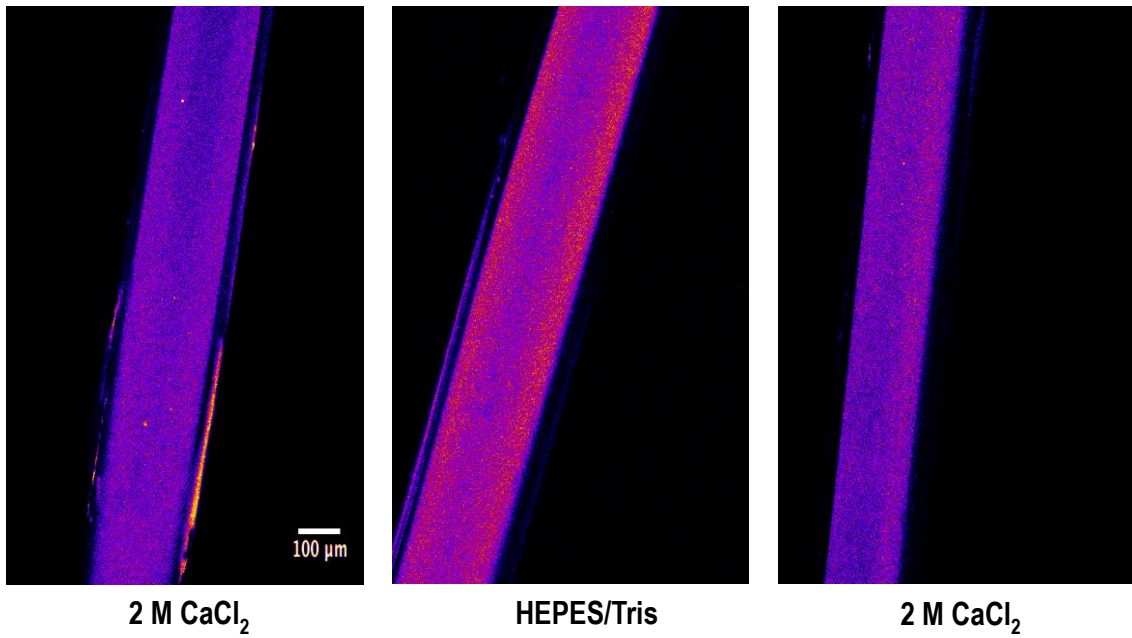

**Figure S6.** LipiSensors have a reversible response to changing [Ca<sup>2+</sup>]. Dialysis tube (13kDa cutoff) with LipiSensors entrapped inside. Images taken with LSM-780 Confocal Microscope.
